# Supplementary material
Source: Springer Nature journal article supplement (https://www.springermedizin.de/resource/supplementary/12985_2010_1008_MOESM14_ESM.pdf/9608936)

A

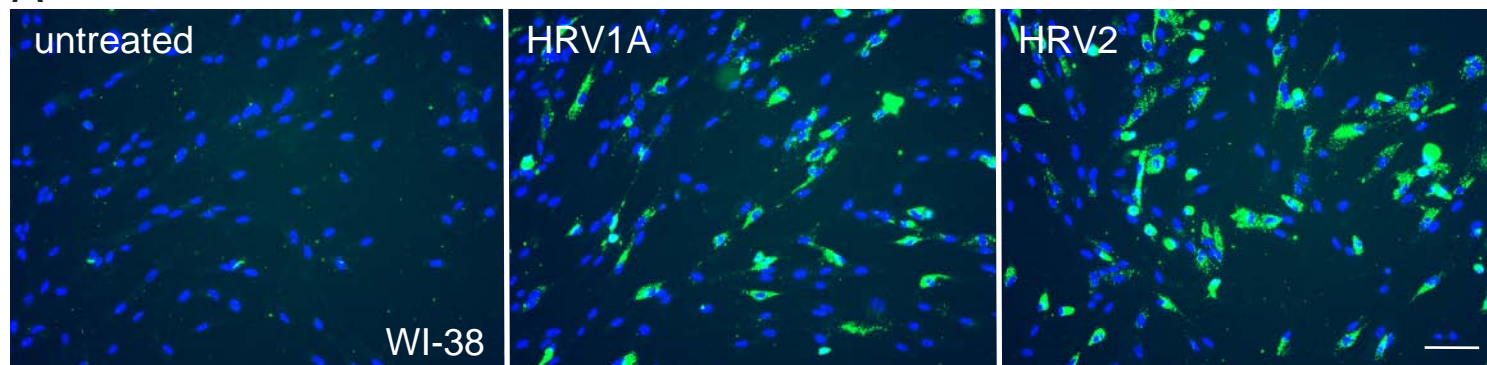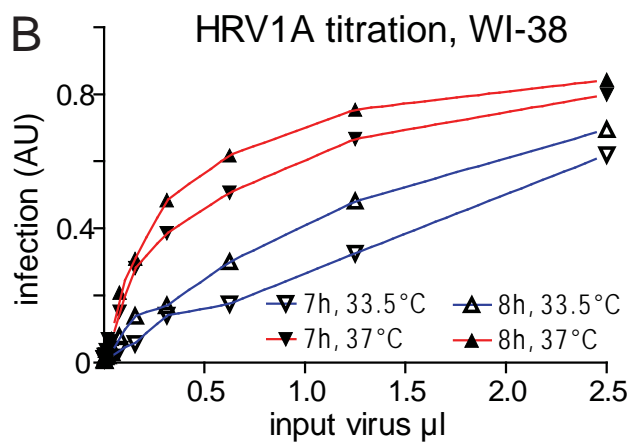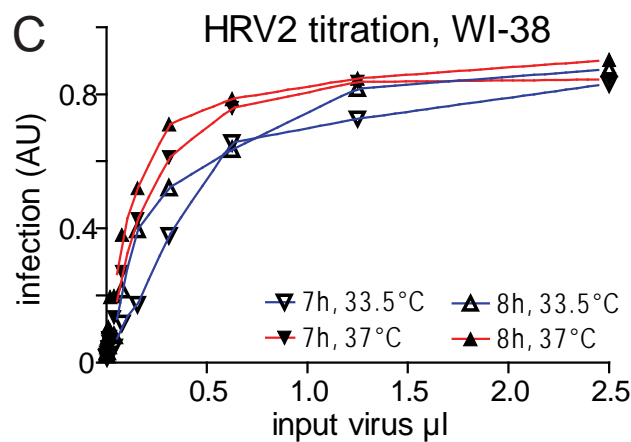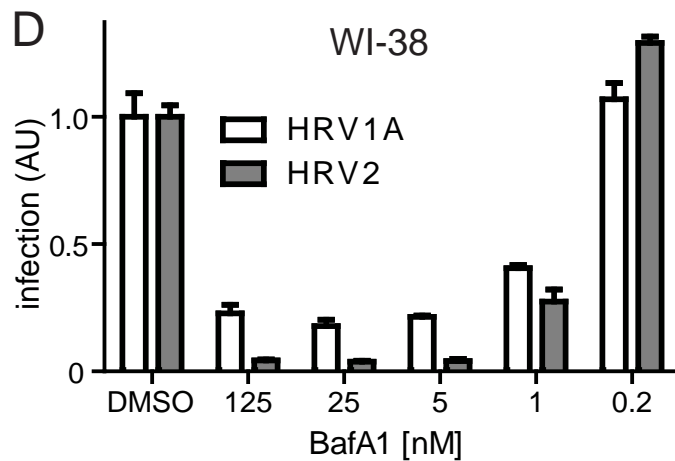

Supplement: MOESM14 [file 9608936]
